# Supplementary material for: Transient Excursions to Membrane Core as Determinants of Influenza Virus Fusion Peptide Activity
Source: Int J Mol Sci. 2021 May 18;22(10):5301. doi: 10.3390/ijms22105301 (PMC8157580; doi:10.3390/ijms22105301)
Supplement: Supplementary file 1 [file ijms-22-05301-s001.zip › ijms-1205057-supplementary.pdf]

# Transient excursions to membrane core as determinants of influenza virus fusion peptide activity

## Supporting Information

Remigiusz Worch<sup>1</sup>, Anita Dudek<sup>2</sup>, Paulina Borkowska<sup>1</sup>, and Piotr Setny<sup>2,\*</sup>

<sup>1</sup>Institute of Physics, Polish Academy of Sciences, Aleja Lotnikow 32/46, PL-02668 Warsaw, Poland

<sup>2</sup>Centre of New Technologies, University of Warsaw, Banacha 2c, 02-097, Warsaw, Poland

\**p.setny@cent.uw.edu.pl*

### Representative structures from tREMD simulations and results for E11 deprotonated peptide ( $\text{wt}^-$ )

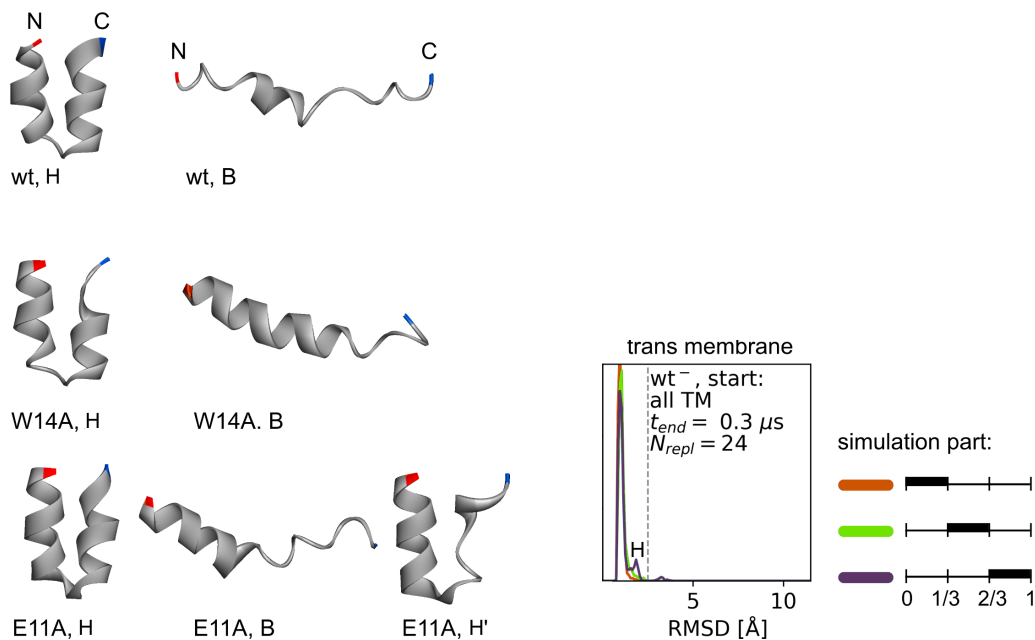

Figure 1: Left: representative conformations from unrestrained simulations for 3 peptide variants. Right: the distribution of root mean square deviation from tight hairpin structure (PDB. 2kxa, model 1) for wild type, E11 deprotonated hemagglutinin fusion peptide ( $\text{wt}^-$  HAfp) simulation in trans-membrane orientation.

## Insertion depths of peptide atoms

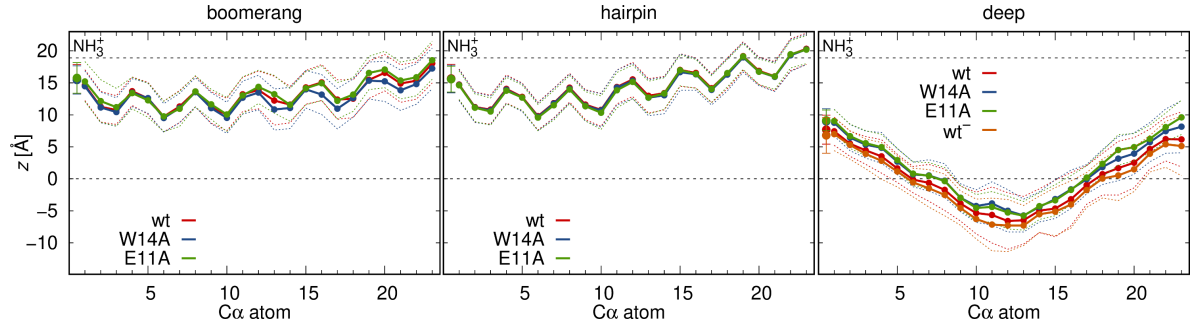

Figure 2: Insertion depths of N-terminal amino group nitrogen atom and C $\alpha$  atoms of wt HAfp in considered configurations. Dotted lines correspond to  $\pm$  one standard deviation. Dashed lines denote membrane surface (the maximum of phosphate atoms density) at  $z = 18.9$  Å, and mid-plane at  $z = 0$ .

### Free energy profiles and free energy calculations.

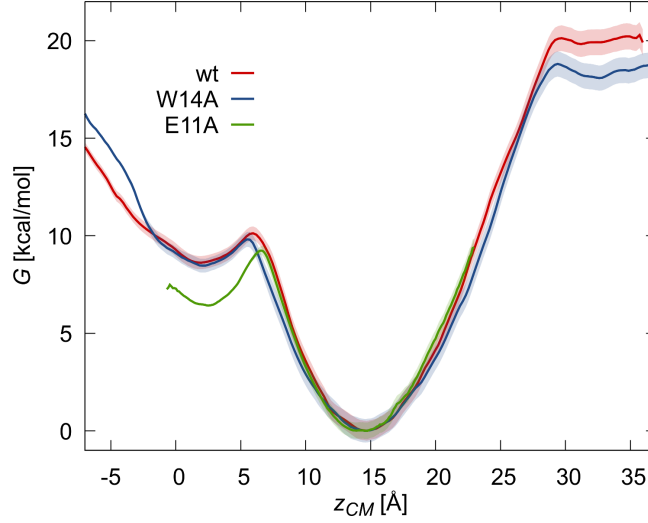

Figure 3: Potentials of mean force for translocation between bulk water and membrane center ( $z = 0$ ) for three peptide variants in helical hairpin configurations enforced by restraining the distances between C $\alpha$  atoms to those observed in HAfp<sub>1-23</sub> NMR structure (pdb 2kxa, model 1). All curves were shifted so that  $G = 0$  corresponds to the minimum of surface free energy basin.

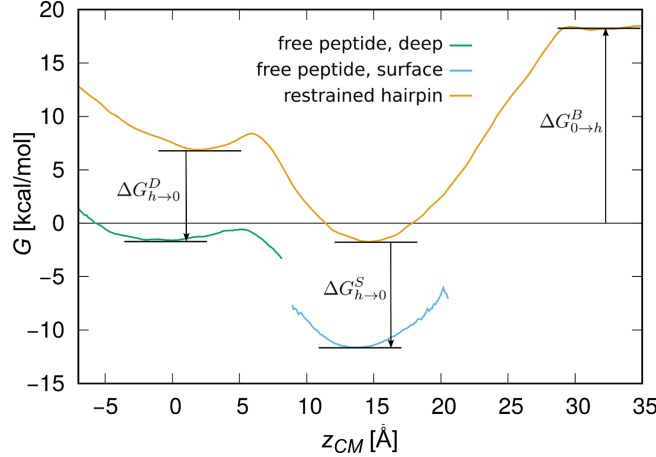

Figure 4: Relations between contributions to free energy considered for obtaining binding free energies of unrestrained peptides at surface and deep minima, relative to undestrained peptides in water. The curves represent data for wt. Free energy level for restrained hairpin in bulk water was assessed based on averaging of PMF from 31 to 35 Å. Free energy levels for free energy basins were taken as local PMF minima. Peptide binding free energies to respective basins were calculated as follows: a) binding from bulk solvent to membrane surface  $\Delta G^{B \rightarrow S} = \Delta G_{0 \rightarrow h}^B + \Delta G_h^{B \rightarrow S} + \Delta G_{h \rightarrow 0}^S$ , b) transition from bulk surface to deep minimum:  $\Delta G^{S \rightarrow D} = -\Delta G_{h \rightarrow 0}^S + \Delta G_h^{S \rightarrow D} + \Delta G_{h \rightarrow 0}^D$ , with the following meaning of free energy contributions:  $\Delta G^{B \rightarrow S}$  binding from bulk solvent to membrane surface,  $\Delta G^{S \rightarrow D}$  transition from surface to deep configuration,  $\Delta G_{0 \rightarrow h}^B$  the cost of peptide restraining to hairpin in bulk solvent,  $\Delta G_h^{B \rightarrow S}$  transition of restrained peptide from bulk solvent to membrane surface,  $\Delta G_{h \rightarrow 0}^S$  restraints removal for surface configuration,  $\Delta G_h^{S \rightarrow D}$  transition of restrained peptide from surface to deep configuration,  $\Delta G_{h \rightarrow 0}^D$  restraints removal for deep configuration.

## Results for Charmm 36 force field

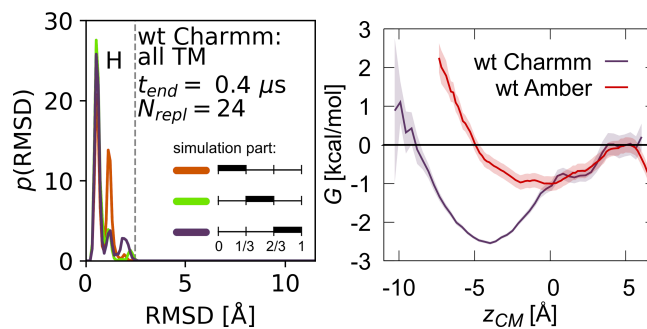

Figure 5: Left: the distribution of root mean square deviation (RMSD) of wt peptide backbone atoms with respect to tight helical hairpin (NMR structure, PDB id 2kxa, model 1) at 310 K from temperature replica exchange (tREMD) simulations conducted with Charmm 36 force field.<sup>1</sup> Right: the potential of mean force for wt transmembrane hairpin configuration obtained with Charmm 36 force field compared to Amber99SB-ILDNP\*<sup>2</sup> (peptide) with Amber Lipid14<sup>3</sup> (lipids).

## Supervised peptide insertion: N terminus

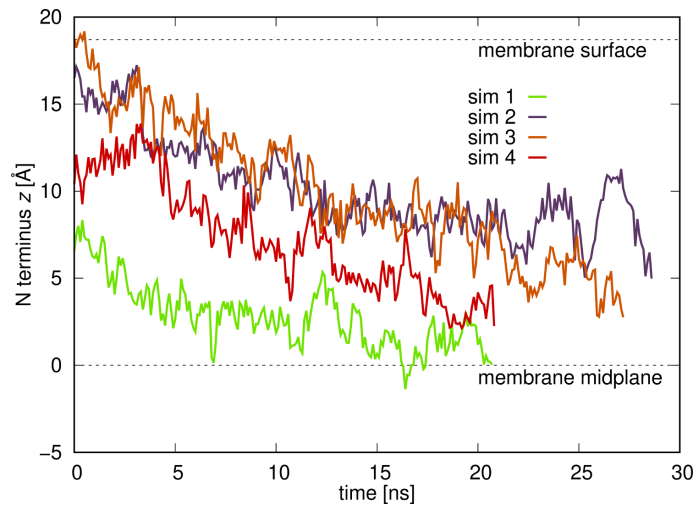

Figure 6: Four trajectories of supervised peptide insertion using the  $z$  coordinate of the N-terminal amino group as a measure of insertion progression. Trajectory #2 is based on 10 simulation rounds, trajectories #1, #3, #4 were extended to 13, 12, 11 rounds, respectively, to check that peptide does not progress further towards membrane core.

## Tryptophan fluorescence quenching

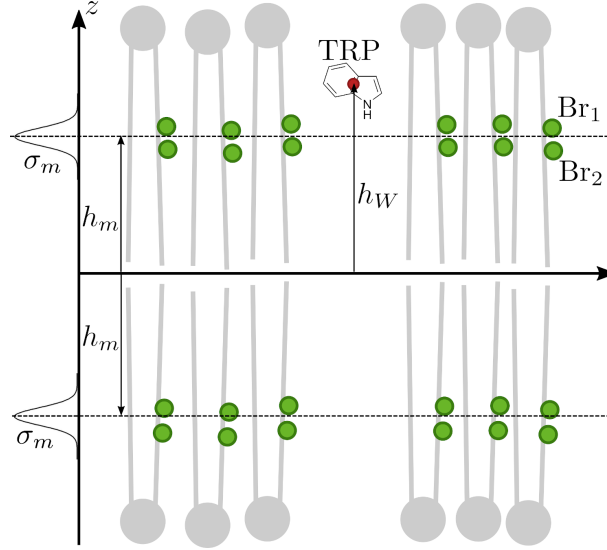

Figure 7: Spatial relations in the Ladokhin model for the estimation of depth-dependent tryptophan fluorescence quenching by brominated lipids.  $h_m$ ,  $\sigma_m$ : average position of Br atoms with respect to membrane centre and its standard deviation, respectively,  $h_W$ : position of Trp indole ring centre with respect to membrane centre.

The ratio of tryptophan fluorescence quenching by lipids specifically brominated at position  $m$ , to fluorescence without the quencher,  $\frac{F_m}{F_0}$ , was estimated using the Ladokhin model,<sup>4</sup> according to the following formula:

$$\frac{F_m}{F_0} = \sum_{W \in \{14, 21\}} \left\langle \exp \left( -G(h_W - h_m, \sigma_m, S) - G(h_W + h_m, \sigma_m, S) \right) \right\rangle_{MD}. \quad (1)$$

As illustrated in Fig. 7,  $h_m$  and  $\sigma_m$  are average position of Br atoms with respect to membrane centre and its standard deviation, respectively,  $h_W$  is the position of tryptophan indole ring centre along the  $z$  axis, and  $G(h_W - h_m, \sigma_m, S) = \frac{S}{\sigma_m \sqrt{2\pi}} \exp \left( -\frac{(h_W - h_m)^2}{\sigma_m^2} \right)$ . The two Gaussian terms describe contributions from both membrane leaflets, with  $S$  being the assumed quenching intensity. The values of  $h_m$  and  $\sigma_m$  were calculated based on pure POPC simulations using the positions of hydrogen atoms corresponding to substituted Br atoms (Table 1). The  $\frac{F_m}{F_0}$  was calculated as an ensemble average, with  $h_W$  values taken from simulation frames corresponding to the considered peptide configuration.

Table 1: Average positions and their standard deviations for Br atoms in doubly substituted brominated lipids.

| Br    | $h_m/\text{\AA}$ | $\sigma_m/\text{\AA}$ |
|-------|------------------|-----------------------|
| 4,5   | 11.6             | 0.5                   |
| 6,7   | 9.9              | 0.6                   |
| 9,10  | 7.5              | 0.7                   |
| 11,12 | 6.3              | 0.7                   |

## Experimental results

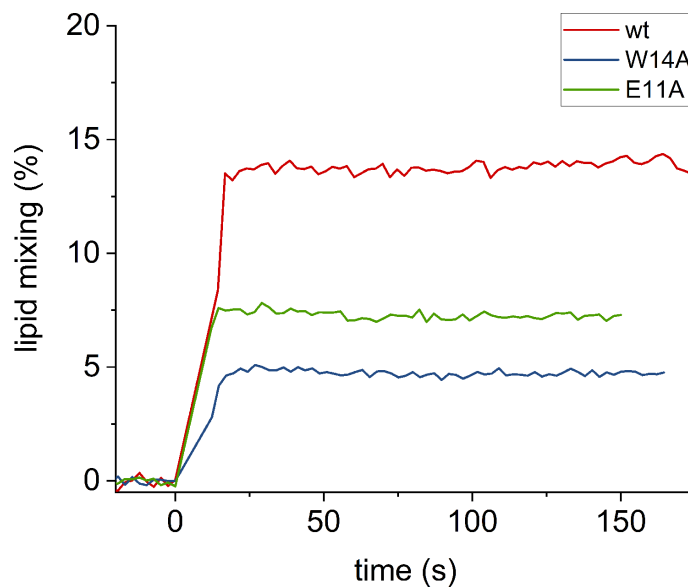

Figure 8: Averaged curves showing the percentage of lipid mixing of POPC LUVs induced by the peptides (FRET assay).

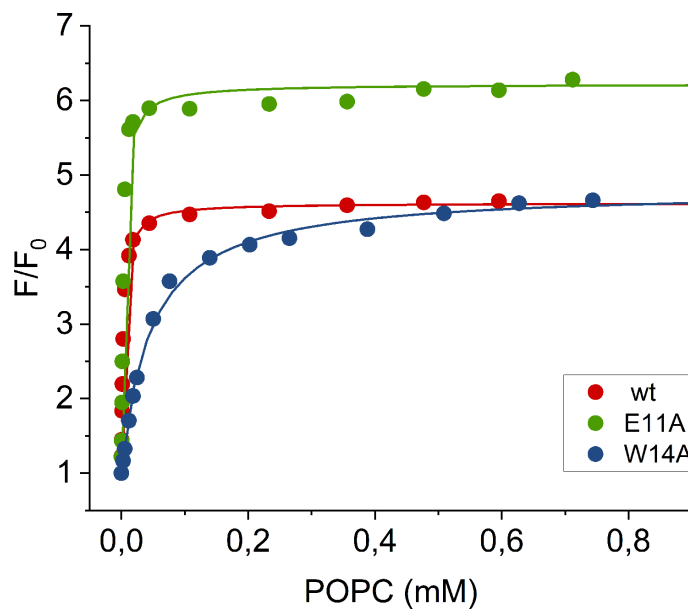

Figure 9: Sample curves showing binding of the peptides to POPC SUVs (corrected for the light scattering).

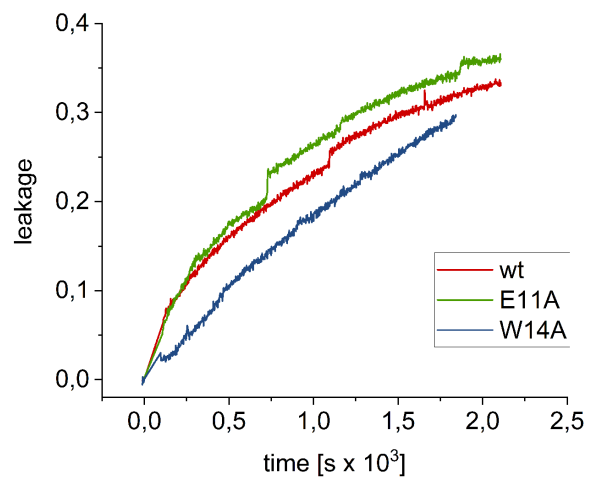

Figure 10: Sample curves of peptide-induced calcein leakage from POPC LUVs at 1:500 peptide/lipid concentration.

## Simulations

Most MD runs reported in this study were based on tREMD scheme (24 or 40 replicas), with the following temperatures generated according to algorithm proposed by Patriksson and van der Spoel:<sup>5</sup> 310.00, 311.57, 313.15, 314.74, 316.34, 317.94, 319.54, 321.16, 322.78, 324.41, 326.05, 327.69, 329.34, 331.00, 332.66, 334.33, 336.01, 337.69, 339.39, 341.09, 342.80, 344.51, 346.23, 347.97, 349.70, 351.45, 353.20, 354.96, 356.73, 358.51, 360.29, 362.08, 363.88, 365.69, 367.50, 369.33, 371.16, 373.00, 374.84, 376.70 K.

Table 2: Summary of tREMD runs for unrestrained peptides starting at different configurations.

| simulation             | N replicas | total t [ $\mu$ s] |
|------------------------|------------|--------------------|
| wt surface boomerang   | 24         | $24 \times 1.4$    |
| wt surface hairpin     | 40         | $40 \times 1.3$    |
| wt TM                  | 24         | $24 \times 0.3$    |
| wt <sup>-</sup> TM     | 24         | $24 \times 0.3$    |
| wt Charmm TM           | 24         | $24 \times 0.4$    |
| W14A surface boomerang | 24         | $24 \times 1.4$    |
| W14A surface hairpin   | 40         | $40 \times 1.0$    |
| W14A TM                | 24         | $24 \times 0.3$    |
| E11A surface boomerang | 24         | $24 \times 0.5$    |
| E11A surface hairpin   | 40         | $40 \times 0.4$    |
| E11A TM                | 24         | $24 \times 0.4$    |

Tables 3 to 5 include information concerning the centres ( $z_0$ ) of umbrella potentials used for free energy simulations, total simulation time per replica at each window  $t_t$ , simulation time actually used for PMF calculations,  $t_u$  (starting from certain point in time, till the end of run), and  $p$  values for Kolomogorof-Smirnoff test assessing the convergence of  $z$  distributions. All simulations were conducted as tREMD with 24 replicas.

| Table 3: PMF: wt |            |            |       | Table 4: PMF: W14A |            |            |       | Table 5: PMF: E11A |            |            |       |
|------------------|------------|------------|-------|--------------------|------------|------------|-------|--------------------|------------|------------|-------|
| $z_0$ [Å]        | $t_t$ [ns] | $t_u$ [ns] | $p$   | $z_0$ [Å]          | $t_t$ [ns] | $t_u$ [ns] | $p$   | $z_0$ [Å]          | $t_t$ [ns] | $t_u$ [ns] | $p$   |
| -10              | 50         | 19.8       | 0.101 | -6                 | 45         | 38.6       | 0.381 | 1                  | 105        | 62.8       | 0.354 |
| -9               | 40         | 24.6       | 0.743 | -5                 | 45         | 34.9       | 0.233 | 2                  | 128        | 127.7      | 0.377 |
| -8               | 40         | 25.6       | 0.139 | -4                 | 45         | 25.9       | 0.231 | 3                  | 78         | 29.6       | 0.323 |
| -6               | 38         | 36.5       | 0.620 | -3                 | 45         | 17.0       | 0.521 | 4                  | 78         | 77.1       | 0.293 |
| -5               | 35         | 11.1       | 0.162 | -2                 | 40         | 39.9       | 0.778 | 5                  | 78         | 27.8       | 0.494 |
| -4               | 48         | 48.3       | 0.233 | -1                 | 60         | 19.1       | 0.266 | 6                  | 173        | 165.4      | 0.202 |
| -3               | 125        | 50.0       | 0.158 | 0                  | 80         | 77.6       | 0.373 | 6.5                | 170        | 58.4       | 0.116 |
| -2               | 60         | 14.4       | 0.308 | 1                  | 60         | 54.8       | 0.491 | 7                  | 540        | 269.6      | 0.369 |
| -1               | 105        | 95.7       | 0.336 | 2                  | 60         | 39.5       | 0.270 | 8                  | 365        | 196.9      | 0.408 |
| 0                | 60         | 38.1       | 0.347 | 3                  | 60         | 42.9       | 0.301 | 9                  | 180        | 79.1       | 0.835 |
| 1                | 60         | 25.1       | 0.226 | 4                  | 90         | 89.8       | 0.203 | 10                 | 80         | 58.9       | 0.479 |
| 2                | 90         | 37.8       | 0.281 | 5                  | 210        | 129.8      | 0.279 | 11                 | 80         | 66.4       | 0.311 |
| 3                | 110        | 109.5      | 0.330 | 5.5                | 100        | 57.7       | 0.219 | 12                 | 80         | 77.9       | 0.226 |
| 4                | 111        | 102.2      | 0.465 | 6                  | 785        | 407.9      | 0.225 | 13                 | 121        | 101.0      | 0.365 |
| 5                | 140        | 75.3       | 0.390 | 7                  | 195        | 128.1      | 0.220 | 14                 | 95         | 85.5       | 0.236 |
| 5.5              | 255        | 51.0       | 0.897 | 8                  | 150        | 56.8       | 0.203 | 15                 | 95         | 56.8       | 0.938 |
| 6                | 415        | 215.4      | 0.334 | 9                  | 100        | 81.7       | 0.234 | 16                 | 10         | 4.6        | 0.322 |
| 7                | 180        | 50.4       | 0.247 | 10                 | 65         | 28.4       | 0.243 | 18                 | 55         | 54.6       | 0.422 |
| 8                | 175        | 45.5       | 0.630 | 11                 | 60         | 53.7       | 0.205 | 20                 | 53         | 11.7       | 0.211 |
| 9                | 90         | 32.3       | 0.388 | 12                 | 60         | 57.0       | 0.225 | 22                 | 30         | 25.1       | 0.205 |
| 10               | 65         | 41.5       | 0.623 | 13                 | 80         | 73.5       | 0.228 |                    |            |            |       |
| 11               | 60         | 16.7       | 0.623 | 14                 | 60         | 52.5       | 0.262 |                    |            |            |       |
| 12               | 60         | 29.9       | 0.258 | 15                 | 60         | 47.8       | 0.368 |                    |            |            |       |
| 13               | 60         | 55.0       | 0.305 | 16                 | 70         | 57.2       | 0.522 |                    |            |            |       |
| 14               | 157        | 56.4       | 0.281 | 18                 | 91         | 23.5       | 0.237 |                    |            |            |       |
| 15               | 60         | 47.8       | 0.110 | 20                 | 70         | 44.6       | 0.286 |                    |            |            |       |
| 16               | 60         | 56.3       | 0.117 | 22                 | 40         | 38.3       | 0.257 |                    |            |            |       |
| 18               | 60         | 47.8       | 0.139 | 24                 | 130        | 57.1       | 0.284 |                    |            |            |       |
| 20               | 20         | 8.3        | 0.380 | 26                 | 74         | 34.0       | 0.641 |                    |            |            |       |
| 22               | 40         | 18.3       | 0.568 | 27                 | 100        | 53.8       | 0.527 |                    |            |            |       |
| 24               | 31         | 27.5       | 0.300 | 28                 | 132        | 42.2       | 0.218 |                    |            |            |       |
| 26               | 40         | 31.0       | 0.950 | 29                 | 100        | 20.0       | 0.632 |                    |            |            |       |
| 27               | 75         | 28.4       | 0.245 | 30                 | 30         | 19.7       | 0.354 |                    |            |            |       |
| 28               | 120        | 28.8       | 0.207 | 32                 | 30         | 11.4       | 0.399 |                    |            |            |       |
| 29               | 60         | 35.7       | 0.255 | 34                 | 40         | 34.3       | 0.546 |                    |            |            |       |
| 30               | 40         | 40.0       | 0.231 | 36                 | 40         | 39.9       | 0.536 |                    |            |            |       |
| 32               | 40         | 28.0       | 0.194 |                    |            |            |       |                    |            |            |       |
| 33               | 60         | 60.0       | 0.598 |                    |            |            |       |                    |            |            |       |
| 34               | 25         | 23.4       | 0.347 |                    |            |            |       |                    |            |            |       |
| 36               | 25         | 24.4       | 0.369 |                    |            |            |       |                    |            |            |       |

## References

- [1] Huang, J.; MacKerell, A. D. *J. Comput. Chem.* **2013**, *34*, 2135–2145.
- [2] Lindorff-Larsen, K.; Piana, S.; Palmo, K.; Maragakis, P.; Klepeis, J. L.; Dror, R. O.; Shaw, D. E. *Proteins Struct. Funct. Bioinforma.* **2010**, *78*, 1950–1958.
- [3] Dickson, C. J.; Madej, B. D.; Skjervik, Å. a.; Betz, R. M.; Teigen, K.; Gould, I. R.; Walker, R. C. *J. Chem. Theory Comput.* **2014**, *10*, 865–879.
- [4] Ladokhin, A. S. *Methods Enzymol.* **1997**, *278*, 462–473.
- [5] Patriksson, A.; van der Spoel, D. *Phys. Chem. Chem. Phys.* **2008**, *10*, 2073.
